# Supplementary material for: Association of Weight for Length vs Body Mass Index During the First 2 Years of Life With Cardiometabolic Risk in Early Adolescence
Source: PubMed Central journal article supplement (PMC6324504; doi:10.1001/jamanetworkopen.2018.2460), 2018-09-21
Supplement: jamanetwopen-1-e182460-s001.pdf [file jamanetwopen-1-e182460-s001.pdf]

## Supplementary Online Content

Aris IM, Rifas-Shiman SL, Li L-J, et al. Association of Weight for Length vs Body Mass Index During the First 2 Years of Life With Cardiometabolic Risk in Early Adolescence. *JAMA Netw Open*. 2018;1(5):e182460. doi:10.1001/jamanetworkopen.2018.2460

eFigure. Flowchart of Study Sample

eTable 1. Intra-class Correlations (ICC) and Agreements Between CDC WFL, WHO WFL and WHO BMI z-Scores in Project Viva and PROBIT

eTable 2. Characteristics of Subjects Included and Excluded From the Study in Project Viva and PROBIT

eTable 3. Associations of Ever Overweight at 6-24 Months With Lean Mass, Adiposity and Metabolic Risk Score Components at Early Adolescence

eTable 4. Associations of Being Overweight at 6 Months With Lean Mass, Adiposity and Metabolic Risk Score Components at Early Adolescence

eTable 5. Associations of Being Overweight at 12 Months With Lean Mass, Adiposity and Metabolic Risk Score Components at Early Adolescence

eTable 6. Associations of Being Overweight at 18 Months With Lean Mass, Adiposity and Metabolic Risk Score Components at Early Adolescence

eTable 7. Associations of Being Overweight at 24 Months With Lean Mass, Adiposity and Metabolic Risk Score Components at Early Adolescence

eTable 8. Associations of Number of Time Points Overweight at 6-24 Months With Lean Mass, Adiposity and Metabolic Risk Score Components at Early Adolescence

This supplementary material has been provided by the authors to give readers additional information about their work.

eFigure 1: Flow chart of study sample

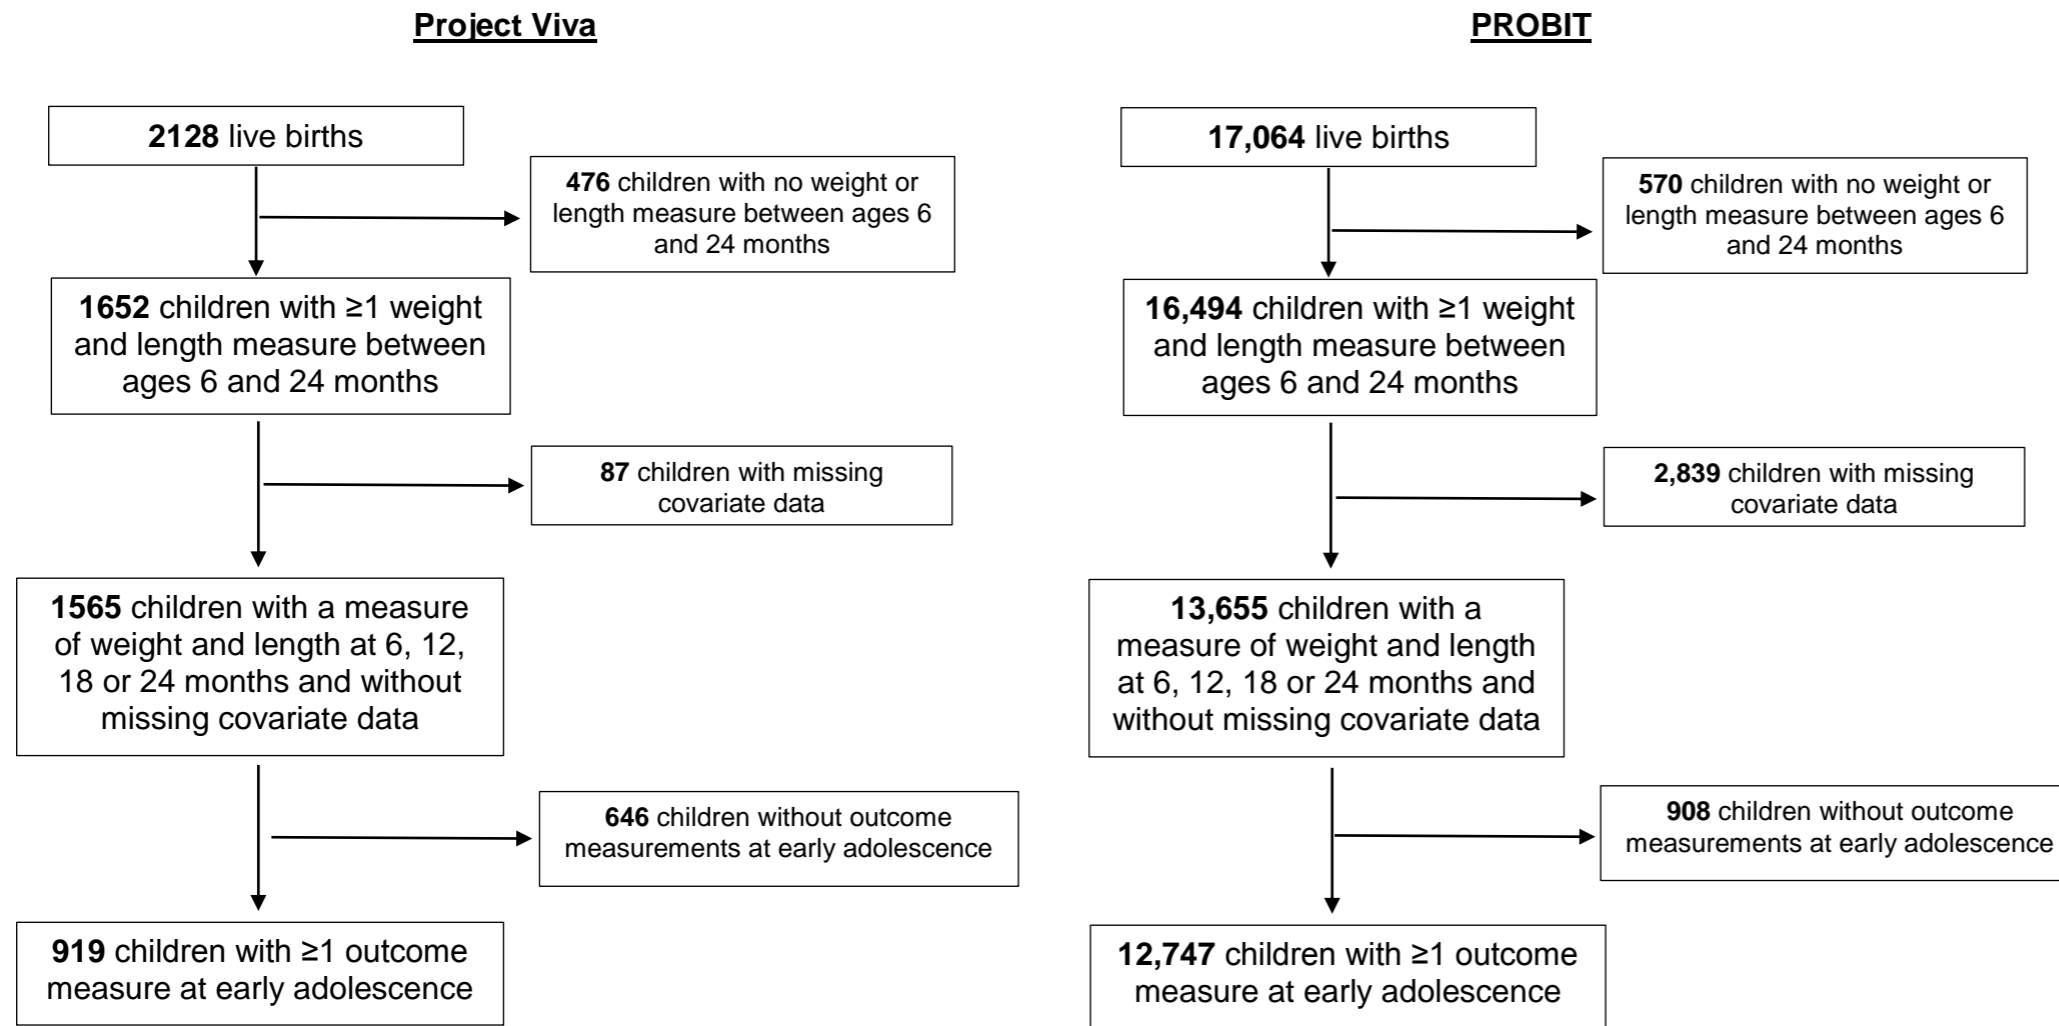

**eTable 1:** Intra-class correlations (ICC) and agreements between CDC WFL, WHO WFL and WHO BMI z-scores in Project Viva and PROBIT

| Project Viva                   |                  |                                       |                                             |                      | PROBIT                            |                  |                                       |                                             |                      |
|--------------------------------|------------------|---------------------------------------|---------------------------------------------|----------------------|-----------------------------------|------------------|---------------------------------------|---------------------------------------------|----------------------|
|                                | ICC for z-scores | % agreement for overweight cut-points | $\kappa$ (95% CI) for overweight cut-points | p value for $\kappa$ |                                   | ICC for z-scores | % agreement for overweight cut-points | $\kappa$ (95% CI) for overweight cut-points | p value for $\kappa$ |
| <b>Month 6 (n=891)</b>         |                  |                                       |                                             |                      | <b>Month 6 (n=12,594)</b>         |                  |                                       |                                             |                      |
| CDC vs WHO WFL                 | 0.99             | 94.6                                  | 0.75 (0.69-0.82)                            | <0.01                |                                   | 0.99             | 95.9                                  | 0.77 (0.75-0.79)                            | <0.01                |
| CDC vs WHO BMI                 | 0.99             | 93.4                                  | 0.68 (0.61-0.76)                            | <0.01                |                                   | 0.99             | 95.0                                  | 0.72 (0.70-0.74)                            | <0.01                |
| WHO WFL vs WHO BMI             | 0.99             | 98.8                                  | 0.93 (0.88-0.97)                            | <0.01                |                                   | 0.99             | 99.2                                  | 0.94 (0.93-0.95)                            | <0.01                |
| <b>Month 12 (n=701)</b>        |                  |                                       |                                             |                      | <b>Month 12 (n=12,707)</b>        |                  |                                       |                                             |                      |
| CDC vs WHO WFL                 | 0.95             | 98.0                                  | 0.87 (0.80-0.94)                            | <0.01                |                                   | 0.95             | 96.6                                  | 0.89 (0.88-0.90)                            | <0.01                |
| CDC vs WHO BMI                 | 0.96             | 98.6                                  | 0.91 (0.85-0.96)                            | <0.01                |                                   | 0.96             | 96.1                                  | 0.87 (0.86-0.88)                            | <0.01                |
| WHO WFL vs WHO BMI             | 0.98             | 98.0                                  | 0.86 (0.78-0.93)                            | <0.01                |                                   | 0.98             | 95.4                                  | 0.84 (0.83-0.85)                            | <0.01                |
| <b>Month 18 (n=634)</b>        |                  |                                       |                                             |                      | <b>Month 18 (n=2,965)</b>         |                  |                                       |                                             |                      |
| CDC vs WHO WFL                 | 0.91             | 99.2                                  | 0.96 (0.92-0.99)                            | <0.01                |                                   | 0.93             | 99.1                                  | 0.96 (0.95-0.98)                            | <0.01                |
| CDC vs WHO BMI                 | 0.89             | 97.6                                  | 0.88 (0.81-0.94)                            | <0.01                |                                   | 0.91             | 96.6                                  | 0.87 (0.84-0.89)                            | <0.01                |
| WHO WFL vs WHO BMI             | 0.98             | 97.2                                  | 0.85 (0.78-0.92)                            | <0.01                |                                   | 0.97             | 96.4                                  | 0.85 (0.83-0.88)                            | <0.01                |
| <b>Month 24 (n=563)</b>        |                  |                                       |                                             |                      | <b>Month 24 (n=4,590)</b>         |                  |                                       |                                             |                      |
| CDC vs WHO WFL                 | 0.94             | 99.1                                  | 0.95 (0.90-0.99)                            | <0.01                |                                   | 0.95             | 98.7                                  | 0.94 (0.93-0.96)                            | <0.01                |
| CDC vs WHO BMI                 | 0.96             | 98.1                                  | 0.88 (0.80-0.95)                            | <0.01                |                                   | 0.94             | 96.3                                  | 0.84 (0.82-0.87)                            | <0.01                |
| WHO WFL vs WHO BMI             | 0.98             | 98.9                                  | 0.93 (0.87-0.99)                            | <0.01                |                                   | 0.98             | 97.1                                  | 0.87 (0.85-0.89)                            | <0.01                |
| <b>Ever overweight (n=919)</b> |                  |                                       |                                             |                      | <b>Ever overweight (n=12,747)</b> |                  |                                       |                                             |                      |
| CDC vs WHO WFL                 | NA               | 94.5                                  | 0.84 (0.80-0.89)                            | <0.01                |                                   | NA               | 94.9                                  | 0.87 (0.86-0.88)                            | <0.01                |
| CDC vs WHO BMI                 | NA               | 93.6                                  | 0.80 (0.75-0.85)                            | <0.01                |                                   | NA               | 93.3                                  | 0.83 (0.82-0.84)                            | <0.01                |
| WHO WFL vs WHO BMI             | NA               | 96.8                                  | 0.89 (0.85-0.93)                            | <0.01                |                                   | NA               | 95.0                                  | 0.86 (0.85-0.87)                            | <0.01                |

NA: not applicable

**eTable 2:** Characteristics of subjects included and excluded from the study in Project Viva and PROBIT

| Project Viva                                              |                                  | Included<br>(n=919)           | Excluded<br>(n=1209)         | p value        |
|-----------------------------------------------------------|----------------------------------|-------------------------------|------------------------------|----------------|
| <b>Maternal</b>                                           |                                  |                               |                              |                |
| <b>Age</b>                                                |                                  |                               |                              |                |
|                                                           | <20 years                        | 29 (3.2)                      | 40 (3.3)                     | 0.02           |
|                                                           | 20-34 years                      | 610 (66.4)                    | 867 (71.7)                   |                |
|                                                           | ≥ 35 years                       | 280 (30.5)                    | 302 (25.0)                   |                |
| <b>Education level</b>                                    |                                  |                               |                              |                |
|                                                           | Not university educated          | 261 (28.4)                    | 483 (40.8)                   | <0.01          |
|                                                           | University educated              | 658 (71.6)                    | 702 (59.2)                   |                |
| <b>Marital status</b>                                     |                                  |                               |                              |                |
|                                                           | Married/co-habituating           | 851 (92.6)                    | 1072 (90.5)                  | 0.09           |
|                                                           | Not married                      | 68 (7.4)                      | 112 (9.5)                    |                |
| <b>Maternal smoking history</b>                           |                                  |                               |                              |                |
|                                                           | Never smoked                     | 650 (70.7)                    | 793 (66.8)                   | <0.01          |
|                                                           | Smoked prior to pregnancy        | 184 (20.0)                    | 214 (18.0)                   |                |
|                                                           | Smoked during pregnancy          | 85 (9.3)                      | 181 (15.2)                   |                |
| <b>Pre-pregnancy BMI (kg/m<sup>2</sup>)</b>               |                                  |                               |                              |                |
|                                                           |                                  | 24.8 (5.2)                    | 24.9 (5.7)                   | 0.58           |
| <b>Total gestational weight gain (kg)</b>                 |                                  |                               |                              |                |
|                                                           |                                  | 15.6 (5.3)                    | 15.5 (6.0)                   | 0.84           |
| <b>Glucose tolerance status</b>                           |                                  |                               |                              |                |
|                                                           | Normoglycemia                    | 764 (83.1)                    | 942 (82.1)                   | 0.72           |
|                                                           | Isolated hyperglycemia           | 80 (8.7)                      | 100 (8.7)                    |                |
|                                                           | Intermediate glucose intolerance | 29 (3.2)                      | 35 (3.1)                     |                |
|                                                           | Gestational diabetes             | 46 (5.0)                      | 71 (6.2)                     |                |
| <b>Hypertensive disorders of pregnancy</b>                |                                  |                               |                              |                |
|                                                           | Normal blood pressure            | 822 (89.4)                    | 1023 (87.9)                  | 0.15           |
|                                                           | Gestational hypertension         | 63 (6.9)                      | 73 (6.3)                     |                |
|                                                           | Chronic Hypertension             | 10 (1.1)                      | 18 (1.6)                     |                |
|                                                           | Pre-eclampsia                    | 24 (2.6)                      | 50 (4.3)                     |                |
| <b>Child</b>                                              |                                  |                               |                              |                |
| <b>Sex</b>                                                |                                  |                               |                              |                |
|                                                           | Male                             | 460 (50.1)                    | 636 (52.6)                   | 0.24           |
|                                                           | Female                           | 459 (49.9)                    | 573 (47.4)                   |                |
| <b>Race/ethnicity</b>                                     |                                  |                               |                              |                |
|                                                           | White                            | 598 (65.1)                    | 744 (62.5)                   | <0.01          |
|                                                           | Black                            | 143 (15.6)                    | 212 (17.8)                   |                |
|                                                           | Hispanic                         | 39 (4.2)                      | 89 (7.5)                     |                |
|                                                           | Asian                            | 27 (2.9)                      | 68 (5.7)                     |                |
|                                                           | Others                           | 112 (12.2)                    | 77 (6.5)                     |                |
| <b>Gestational age at delivery (weeks)</b>                |                                  |                               |                              |                |
|                                                           |                                  | 39.6 (1.6)                    | 39.3 (2.2)                   | <0.01          |
| <b>Birthweight-for-gestational age z-score (SD units)</b> |                                  |                               |                              |                |
|                                                           |                                  | 0.2 (1.0)                     | 0.2 (1.0)                    | 0.26           |
| <b>Breastfeeding status at 6 months</b>                   |                                  |                               |                              |                |
|                                                           | Formula only                     | 79 (9.1)                      | 138 (15.8)                   | <0.01          |
|                                                           | Weaned                           | 312 (35.9)                    | 367 (42.1)                   |                |
|                                                           | Mixed feeding                    | 239 (27.5)                    | 178 (20.4)                   |                |
|                                                           | Breastmilk only                  | 239 (27.5)                    | 188 (21.6)                   |                |
| <b>Ever overweight during 6–24 months</b>                 |                                  |                               |                              |                |
|                                                           | No                               | 758 (82.5)                    | 615 (83.9)                   | 0.44           |
|                                                           | Yes                              | 161 (17.5)                    | 118 (16.1)                   |                |
| <b>PROBIT</b>                                             |                                  |                               |                              |                |
|                                                           |                                  | <b>Included<br/>(n=12747)</b> | <b>Excluded<br/>(n=4299)</b> | <b>p value</b> |
| <b>Maternal</b>                                           |                                  |                               |                              |                |
| <b>Age</b>                                                |                                  |                               |                              |                |
|                                                           | <20 years                        | 1704 (13.6)                   | 663 (16.0)                   | <0.01          |
|                                                           | 20-34 years                      | 10284 (82.1)                  | 3315 (79.8)                  |                |
|                                                           | ≥ 35 years                       | 542 (4.3)                     | 177 (4.3)                    |                |
| <b>Education level</b>                                    |                                  |                               |                              |                |
|                                                           | Did not complete university      | 11047 (86.7)                  | 3683 (85.7)                  | <0.01          |
|                                                           | Completed university             | 1700 (13.3)                   | 616 (14.3)                   |                |
| <b>Marital status</b>                                     |                                  |                               |                              |                |
|                                                           | Registered/unregistered marriage | 12280 (96.3)                  | 4071 (94.7)                  | <0.01          |
|                                                           | Unmarried                        | 467 (3.7)                     | 228 (5.3)                    |                |
| <b>Smoking during pregnancy</b>                           |                                  |                               |                              |                |
|                                                           | No                               | 12499 (98.1)                  | 4158 (96.7)                  | <0.01          |
|                                                           | Yes                              | 248 (1.9)                     | 141 (3.3)                    |                |
| <b>BMI at 6.5 years (kg/m<sup>2</sup>)</b>                |                                  |                               |                              |                |
|                                                           |                                  | 24.5 (4.4)                    | 24.1 (4.2)                   | 0.03           |
| <b>Child</b>                                              |                                  |                               |                              |                |
| <b>Sex</b>                                                |                                  |                               |                              |                |
|                                                           | Male                             | 6204 (48.7)                   | 1951 (46.4)                  | 0.01           |
|                                                           | Female                           | 6543 (51.3)                   | 2254 (53.6)                  |                |
| <b>Gestational age at delivery (weeks)</b>                |                                  |                               |                              |                |
|                                                           |                                  | 39.4 (1.0)                    | 39.4 (1.0)                   | 0.44           |
| <b>Birthweight-for-gestational age z-score (SD units)</b> |                                  |                               |                              |                |
|                                                           |                                  | 0.4 (1.0)                     | 0.3 (0.9)                    | <0.01          |
| <b>Ever overweight during 6–24 months</b>                 |                                  |                               |                              |                |
|                                                           | No                               | 9622 (75.5)                   | 2906 (77.6)                  | <0.01          |
|                                                           | Yes                              | 3125 (24.5)                   | 841 (22.4)                   |                |

**eTable 3:** Associations of ever overweight at 6–24 months with lean mass, adiposity and metabolic risk score components at early adolescence

|                                        | N   | Project Viva         |                      |                     |                      |                      |                     |                      |                      |                     | PROBIT               |                      |                      |                      |                      |                     |                      |                      |                       |       |
|----------------------------------------|-----|----------------------|----------------------|---------------------|----------------------|----------------------|---------------------|----------------------|----------------------|---------------------|----------------------|----------------------|----------------------|----------------------|----------------------|---------------------|----------------------|----------------------|-----------------------|-------|
|                                        |     | CDC WFL [β (95% CI)] |                      |                     | WHO WFL [β (95% CI)] |                      |                     | WHO BMI [β (95% CI)] |                      |                     | CDC WFL [β (95% CI)] |                      |                      | WHO WFL [β (95% CI)] |                      |                     | WHO BMI [β (95% CI)] |                      |                       |       |
|                                        |     | Model 1 <sup>a</sup> | Model 2 <sup>b</sup> | F-statistic Model 2 | Model 1 <sup>a</sup> | Model 2 <sup>b</sup> | F-statistic Model 2 | Model 1 <sup>a</sup> | Model 2 <sup>b</sup> | F-statistic Model 2 | Model 1 <sup>a</sup> | Model 2 <sup>c</sup> | F-statistic Model 2  | Model 1 <sup>a</sup> | Model 2 <sup>c</sup> | F-statistic Model 2 | Model 1 <sup>a</sup> | Model 2 <sup>c</sup> | F-statistic Model 2   |       |
| <b>Lean mass</b>                       |     |                      |                      |                     |                      |                      |                     |                      |                      |                     |                      |                      |                      |                      |                      |                     |                      |                      |                       |       |
| Height z-score (SD units)              | 919 | 0.3<br>(0.1,0.4)     | 0.2<br>(0.01,0.3)    | 4.2                 | 0.3<br>(0.1,0.4)     | 0.2<br>(0.02,0.4)    | 4.2                 | 0.3<br>(0.1,0.4)     | 0.2<br>(0.0,0.3)     | 4.2                 | 12530                | 0.08<br>(0.04,0.1)   | 0.03<br>(-0.01,0.07) | 52.2                 | 0.09<br>(0.05,0.1)   | 0.04<br>(0.0,0.8)   | 52.4                 | 0.03<br>(-0.02,0.07) | -0.02<br>(-0.06,0.02) | 52.1  |
| <b>Overall adiposity</b>               |     |                      |                      |                     |                      |                      |                     |                      |                      |                     |                      |                      |                      |                      |                      |                     |                      |                      |                       |       |
| BMI z-score (SD units)                 | 916 | 0.6<br>(0.5,0.8)     | 0.4<br>(0.3,0.6)     | 11.8                | 0.7<br>(0.5,0.9)     | 0.5<br>(0.3,0.7)     | 11.9                | 0.7<br>(0.5,0.9)     | 0.5<br>(0.3,0.7)     | 12.0                | 12523                | 0.4<br>(0.3,0.4)     | 0.3<br>(0.3,0.4)     | 102.2                | 0.4<br>(0.4,0.5)     | 0.3<br>(0.3,0.4)    | 98.5                 | 0.4<br>(0.3,0.4)     | 0.3<br>(0.3,0.4)      | 97.4  |
| SS+TR (mm)                             | 917 | 4.1<br>(2.0,6.2)     | 2.4<br>(0.4,4.4)     | 9.6                 | 5.0<br>(2.7,7.4)     | 3.0<br>(0.8,5.2)     | 9.7                 | 5.5<br>(3.2,7.9)     | 3.7<br>(1.6,5.9)     | 9.9                 | 12523                | 2.6<br>(2.1,3.0)     | 2.7<br>(2.3,3.1)     | 65.6                 | 2.6<br>(2.2,3.1)     | 2.9<br>(2.4,3.3)    | 65.5                 | 2.6<br>(2.2,3.1)     | 2.7<br>(2.3,3.1)      | 64.3  |
| Fat-mass index (kg/m <sup>2</sup> )    | 912 | 1.4<br>(0.8,1.9)     | 0.9<br>(0.5,1.4)     | 17.1                | 1.6<br>(1.0,2.2)     | 1.1<br>(0.6,1.6)     | 17.3                | 1.8<br>(1.2,2.4)     | 1.4<br>(0.9,1.9)     | 17.8                | 12435                | 0.5<br>(0.4,0.6)     | 0.5<br>(0.4,0.6)     | 88.7                 | 0.5<br>(0.4,0.6)     | 0.6<br>(0.5,0.7)    | 88.3                 | 0.5<br>(0.4,0.6)     | 0.6<br>(0.5,0.7)      | 87.1  |
| Obesity (Odds ratio)                   | 916 | 2.4<br>(1.6,3.7)     | 1.9<br>(1.1,3.1)     | 153.9               | 2.6<br>(1.6,4.0)     | 2.0<br>(1.2,3.3)     | 154.2               | 3.1<br>(2.0,4.8)     | 2.6<br>(1.5,4.4)     | 160.2               | 12523                | 2.2<br>(1.9,2.6)     | 2.1<br>(1.8,2.5)     | 298.6                | 2.2<br>(1.9,2.6)     | 2.1<br>(1.8,2.5)    | 296.2                | 2.1<br>(1.8,2.5)     | 2.0<br>(1.7,2.4)      | 289.9 |
| <b>Metabolic risk score components</b> |     |                      |                      |                     |                      |                      |                     |                      |                      |                     |                      |                      |                      |                      |                      |                     |                      |                      |                       |       |
| Waist circumference (cm)               | 919 | 5.5<br>(3.7,7.3)     | 3.9<br>(2.3,5.6)     | 11.3                | 6.4<br>(4.4,8.3)     | 4.5<br>(2.6,6.3)     | 11.4                | 7.0<br>(5.0,8.9)     | 5.4<br>(3.6,7.2)     | 11.9                | 12529                | 2.6<br>(2.3,2.9)     | 2.2<br>(1.9,2.5)     | 82.4                 | 2.8<br>(2.5,3.1)     | 2.4<br>(2.0,2.7)    | 82.8                 | 2.5<br>(2.2,2.8)     | 2.1<br>(1.8,2.4)      | 79.4  |
| Systolic BP z-score (SD units)         | 911 | 0.09<br>(-0.05,0.2)  | 0.08<br>(-0.05,0.2)  | 1.2                 | 0.06<br>(-0.08,0.2)  | 0.05<br>(-0.1,0.2)   | 1.1                 | 0.03<br>(-0.1,0.2)   | 0.02<br>(-0.1,0.2)   | 1.1                 | 12493                | 0.04<br>(0.01,0.08)  | 0.05<br>(0.02,0.08)  | 8.1                  | 0.04<br>(0.01,0.07)  | 0.05<br>(0.01,0.08) | 7.9                  | 0.04<br>(0.01,0.07)  | 0.04<br>(0.01,0.08)   | 7.8   |
| HOMA-IR                                | 538 | 0.05<br>(-0.07,0.2)  | 0.05<br>(0.07,0.17)  | 4.2                 | 0.1<br>(-0.01,0.3)   | 0.09<br>(0.03,0.22)  | 4.2                 | 0.1<br>(-0.01,0.3)   | 0.1<br>(0.03,0.23)   | 4.2                 | 11771                | 0.02<br>(-0.02,0.06) | 0.07<br>(0.03,0.1)   | 27.4                 | 0.01<br>(-0.03,0.06) | 0.08<br>(0.04,0.1)  | 27.5                 | 0.01<br>(-0.03,0.06) | 0.06<br>(0.01,0.1)    | 27.1  |
| HDL-cholesterol (mg/dL)                | 608 | -0.07<br>(-2.7,2.5)  | -0.3<br>(-2.9,2.3)   | 2.1                 | -1.1<br>(-4.0,1.7)   | -1.5<br>(-4.4,1.4)   | 2.2                 | -0.8<br>(-3.7,2.0)   | -1.5<br>(-4.4,1.4)   | 2.2                 | NA                   | NA                   | NA                   | NA                   | NA                   | NA                  | NA                   | NA                   | NA                    | NA    |
| Triglycerides (mg/dL)                  | 607 | -1.4<br>(-7.3,4.5)   | 0.7<br>(-5.4,6.8)    | 1.1                 | 0.2<br>(-6.2,6.7)    | 2.6<br>(-4.1,9.2)    | 1.2                 | 0.4<br>(-6.1,6.9)    | 2.5<br>(-4.2,9.2)    | 1.2                 | NA                   | NA                   | NA                   | NA                   | NA                   | NA                  | NA                   | NA                   | NA                    | NA    |
| Apo A1 (g/L)                           | NA  | NA                   | NA                   | NA                  | NA                   | NA                   | NA                  | NA                   | NA                   | NA                  | 12046                | 0.0<br>(-0.01,0.02)  | 0.0<br>(-0.01,0.02)  | 2.1                  | 0.0<br>(-0.01,0.02)  | 0.0<br>(0.01,0.02)  | 2.1                  | 0.0<br>(-0.01,0.02)  | 0.0<br>(0.02,0.01)    | 2.1   |
| <b>Global metabolic risk</b>           |     |                      |                      |                     |                      |                      |                     |                      |                      |                     |                      |                      |                      |                      |                      |                     |                      |                      |                       |       |
| Metabolic risk score (units)           | 534 | 0.08<br>(-0.04,0.2)  | 0.08<br>(-0.04,0.2)  | 3.2                 | 0.1<br>(0.0,0.3)     | 0.12<br>(-0.01,0.25) | 3.2                 | 0.1<br>(0.03,0.3)    | 0.12<br>(-0.01,0.26) | 3.2                 | 11442                | 0.09<br>(0.08,0.1)   | 0.09<br>(0.07,0.11)  | 32.2                 | 0.1<br>(0.08,0.1)    | 0.09<br>(0.07,0.12) | 32.2                 | 0.09<br>(-0.07,0.1)  | 0.08<br>(0.06,0.1)    | 30.8  |

<sup>a</sup> Unadjusted

<sup>b</sup> Adjusted for maternal age, marital status, educational attainment, pre-pregnancy BMI, total gestational weight gain, smoking history, glucose tolerance status, and gestational hypertensive disorders and child gestational age at delivery, race/ethnicity, sex, birth weight for gestational age z-scores, breastfeeding status at 6 months and age at outcome measurement.

<sup>c</sup> Adjusted for maternal age, maternal BMI at 6.5 years, educational attainment, marital status, smoking during pregnancy, gestational age at delivery, child sex, birth weight for gestational age z-scores and age at outcome measurement.

**eTable 4:** Associations of being overweight at 6 months with lean mass, adiposity and metabolic risk score components at early adolescence

|                                        | Project Viva |                      |                      |                     |                      |                      |                     |                      |                      |                     | PROBIT |                      |                      |                     |                      |                      |                     |                      |                      |                     |
|----------------------------------------|--------------|----------------------|----------------------|---------------------|----------------------|----------------------|---------------------|----------------------|----------------------|---------------------|--------|----------------------|----------------------|---------------------|----------------------|----------------------|---------------------|----------------------|----------------------|---------------------|
|                                        | N            | CDC WFL [β (95% CI)] |                      |                     | WHO WFL [β (95% CI)] |                      |                     | WHO BMI [β (95% CI)] |                      |                     | N      | CDC WFL [β (95% CI)] |                      |                     | WHO WFL [β (95% CI)] |                      |                     | WHO BMI [β (95% CI)] |                      |                     |
|                                        |              | Model 1 <sup>a</sup> | Model 2 <sup>b</sup> | F-statistic Model 2 | Model 1 <sup>a</sup> | Model 2 <sup>b</sup> | F-statistic Model 2 | Model 1 <sup>a</sup> | Model 2 <sup>b</sup> | F-statistic Model 2 |        | Model 1 <sup>a</sup> | Model 2 <sup>c</sup> | F-statistic Model 2 | Model 1 <sup>a</sup> | Model 2 <sup>c</sup> | F-statistic Model 2 | Model 1 <sup>a</sup> | Model 2 <sup>c</sup> | F-statistic Model 2 |
| <b>Lean mass</b>                       |              |                      |                      |                     |                      |                      |                     |                      |                      |                     |        |                      |                      |                     |                      |                      |                     |                      |                      |                     |
| Height z-score (SD units)              | 891          | 0.04 (-0.15,0.22)    | -0.01 (-0.19,0.17)   | 3.8                 | -0.01 (-0.2,0.2)     | -0.09 (-0.3,0.1)     | 3.9                 | -0.01 (-0.2,0.2)     | -0.08 (-0.3,0.2)     | 3.9                 | 12379  | -0.05 (-0.1,0.01)    | -0.07 (-0.1,-0.02)   | 51.9                | -0.06 (-0.1,0.01)    | -0.09 (-0.1,-0.02)   | 51.9                | -0.07 (-0.01,0.0)    | -0.09 (-0.1,-0.02)   | 52.0                |
| <b>Overall adiposity</b>               |              |                      |                      |                     |                      |                      |                     |                      |                      |                     |        |                      |                      |                     |                      |                      |                     |                      |                      |                     |
| BMI z-score (SD units)                 | 888          | 0.5 (0.3,0.7)        | 0.3 (0.1,0.5)        | 10.6                | 0.5 (0.3,0.7)        | 0.3 (0.1,0.5)        | 10.4                | 0.5 (0.2,0.7)        | 0.3 (0.1,0.6)        | 10.4                | 12373  | 0.3 (0.3,0.4)        | 0.3 (0.2,0.3)        | 82.6                | 0.3 (0.2,0.4)        | 0.2 (0.2,0.3)        | 78.4                | 0.3 (0.2,0.4)        | 0.3 (0.2,0.3)        | 78.3                |
| SS+TR (mm)                             | 889          | 1.9 (-0.7,4.5)       | 0.3 (-2.1,2.7)       | 9.3                 | 1.0 (-2.1,4.1)       | -0.4 (-3.3,2.4)      | 9.3                 | 1.3 (-2.0,4.6)       | 0.2 (-2.8,3.2)       | 9.3                 | 12372  | 1.7 (1.1,2.3)        | 1.7 (1.2,2.3)        | 55.8                | 1.6 (0.8,2.3)        | 1.5 (0.8,2.2)        | 54.6                | 1.6 (0.9,2.4)        | 1.6 (0.9,2.4)        | 54.7                |
| Fat-mass index (kg/m <sup>2</sup> )    | 884          | 0.5 (-0.1,1.2)       | 0.2 (-0.3,0.8)       | 15.8                | 0.5 (-0.3,1.2)       | 0.2 (-0.4,0.9)       | 15.8                | 0.5 (-0.3,1.3)       | 0.4 (-0.3,1.1)       | 15.8                | 12292  | 0.4 (0.3,0.5)        | 0.4 (0.3,0.5)        | 78.1                | 0.3 (0.2,0.5)        | 0.3 (0.2,0.5)        | 76.3                | 0.4 (0.2,0.5)        | 0.4 (0.2,0.5)        | 76.4                |
| Obesity (Odds ratio)                   | 888          | 1.4 (0.8,2.4)        | 0.9 (0.5,1.7)        | 146.3               | 1.2 (0.6,2.2)        | 0.8 (0.4,1.7)        | 146.6               | 1.4 (0.7,2.7)        | 1.0 (0.5,2.2)        | 146.2               | 12373  | 2.0 (1.6,2.4)        | 1.9 (1.5,2.3)        | 266.1               | 1.8 (1.4,2.3)        | 1.7 (1.3,2.2)        | 249.1               | 1.9 (1.5,2.5)        | 1.8 (1.4,2.3)        | 251.8               |
| <b>Metabolic risk score components</b> |              |                      |                      |                     |                      |                      |                     |                      |                      |                     |        |                      |                      |                     |                      |                      |                     |                      |                      |                     |
| Waist circumference (cm)               | 892          | 3.7 (1.6,5.9)        | 2.0 (0.0,3.9)        | 10.0                | 3.9 (1.3,6.5)        | 2.1 (-0.3,4.5)       | 10.0                | 4.3 (1.5,7.0)        | 2.7 (0.1,5.2)        | 10.1                | 12378  | 1.7 (1.2,2.1)        | 1.4 (1.0,1.8)        | 69.2                | 1.6 (1.1,2.1)        | 1.2 (0.7,1.7)        | 67.5                | 1.6 (1.1,2.1)        | 1.2 (0.7,1.7)        | 67.5                |
| Systolic BP z-score (SD units)         | 884          | 0.08 (-0.08,0.2)     | 0.05 (-0.1,0.2)      | 1.3                 | 0.02 (-0.2,0.2)      | -0.01 (-0.2,0.2)     | 1.3                 | 0.04 (-0.2,0.2)      | 0.01 (-0.2,0.2)      | 1.3                 | 12342  | 0.07 (0.03,0.1)      | 0.07 (0.03,0.1)      | 8.2                 | 0.06 (0.01,0.1)      | 0.05 (0.0,0.1)       | 7.7                 | 0.07 (0.01,0.1)      | 0.06 (0.0,0.1)       | 7.8                 |
| HOMA-IR                                | 521          | -0.03 (-0.2,0.1)     | -0.02 (-0.1,0.1)     | 4.2                 | -0.04 (-0.2,0.1)     | -0.03 (-0.2,0.1)     | 4.2                 | -0.08 (-0.3,0.1)     | -0.06 (-0.2,0.1)     | 4.2                 | 11634  | 0.01 (-0.05,0.07)    | 0.04 (-0.01,0.1)     | 26.1                | -0.01 (-0.08,0.06)   | 0.03 (-0.04,0.1)     | 26.0                | -0.03 (-0.1,0.04)    | 0.01 (-0.06,0.08)    | 26.0                |
| HDL-cholesterol (mg/dL)                | 590          | 0.2 (-2.9,3.2)       | 0.2 (-2.8,3.3)       | 2.0                 | 0.7 (-3.0,4.3)       | 0.8 (-2.9,4.5)       | 2.0                 | 0.2 (-3.7,4.1)       | -0.1 (-4.0,3.8)      | 2.0                 | NA     | NA                   | NA                   | NA                  | NA                   | NA                   | NA                  | NA                   | NA                   | NA                  |
| Triglycerides (mg/dL)                  | 589          | -1.0 (-7.9,5.9)      | 0.5 (-6.6,7.6)       | 1.2                 | -2.9 (-11.3,5.4)     | -1.4 (-9.9,7.1)      | 1.2                 | -6.0 (-14.9,2.9)     | -4.0 (-13.1,5.0)     | 1.3                 | NA     | NA                   | NA                   | NA                  | NA                   | NA                   | NA                  | NA                   | NA                   | NA                  |
| Apo A1 (g/L)                           | NA           | NA                   | NA                   | NA                  | NA                   | NA                   | NA                  | NA                   | NA                   | NA                  | 11904  | -0.01 (-0.03,0.01)   | -0.01 (-0.03,0.01)   | 2.3                 | -0.01 (-0.03,0.02)   | -0.01 (-0.04,0.01)   | 2.3                 | -0.02 (-0.04,0.01)   | -0.02 (-0.05,0.0)    | 2.4                 |
| <b>Global metabolic risk</b>           |              |                      |                      |                     |                      |                      |                     |                      |                      |                     |        |                      |                      |                     |                      |                      |                     |                      |                      |                     |
| Metabolic risk score (units)           | 518          | 0.0 (-0.1,0.1)       | -0.01 (-0.2,0.1)     | 3.1                 | -0.04 (-0.2,0.1)     | -0.07 (-0.2,0.1)     | 3.1                 | -0.06 (-0.2,0.1)     | -0.07 (-0.2,0.1)     | 3.1                 | 11308  | 0.06 (0.03,0.08)     | 0.05 (0.02,0.08)     | 27.9                | 0.05 (0.02,0.09)     | 0.04 (0.0,0.07)      | 27.5                | 0.05 (0.01,0.08)     | 0.04 (0.0,0.07)      | 27.4                |

<sup>a</sup> Unadjusted

<sup>b</sup> Adjusted for maternal age, marital status, educational attainment, pre-pregnancy BMI, total gestational weight gain, smoking history, glucose tolerance status, and gestational hypertensive disorders and child gestational age at delivery, race/ethnicity, sex, birth weight for gestational age z-scores, breastfeeding status at 6 months and age at outcome measurement.

<sup>c</sup> Adjusted for maternal age, maternal BMI at 6.5 years, educational attainment, marital status, smoking during pregnancy, gestational age at delivery, child sex, birth weight for gestational age z-scores and age at outcome measurement.

**eTable 5:** Associations of being overweight at 12 months with lean mass, adiposity and metabolic risk score components at early adolescence

|                                        | Project Viva |                      |                      |                     |                      |                      |                     |                      |                      |                     | PROBIT |                      |                      |                     |                      |                      |                     |                      |                      |                     |
|----------------------------------------|--------------|----------------------|----------------------|---------------------|----------------------|----------------------|---------------------|----------------------|----------------------|---------------------|--------|----------------------|----------------------|---------------------|----------------------|----------------------|---------------------|----------------------|----------------------|---------------------|
|                                        | N            | CDC WFL [β (95% CI)] |                      |                     | WHO WFL [β (95% CI)] |                      |                     | WHO BMI [β (95% CI)] |                      |                     | N      | CDC WFL [β (95% CI)] |                      |                     | WHO WFL [β (95% CI)] |                      |                     | WHO BMI [β (95% CI)] |                      |                     |
|                                        |              | Model 1 <sup>a</sup> | Model 2 <sup>b</sup> | F-statistic Model 2 | Model 1 <sup>a</sup> | Model 2 <sup>b</sup> | F-statistic Model 2 | Model 1 <sup>a</sup> | Model 2 <sup>b</sup> | F-statistic Model 2 |        | Model 1 <sup>a</sup> | Model 2 <sup>c</sup> | F-statistic Model 2 | Model 1 <sup>a</sup> | Model 2 <sup>c</sup> | F-statistic Model 2 | Model 1 <sup>a</sup> | Model 2 <sup>c</sup> | F-statistic Model 2 |
| <b>Lean mass</b>                       |              |                      |                      |                     |                      |                      |                     |                      |                      |                     |        |                      |                      |                     |                      |                      |                     |                      |                      |                     |
| Height z-score (SD units)              | 701          | 0.3<br>(0.1,0.6)     | 0.2<br>(-0.05,0.5)   | 3.3                 | 0.4<br>(0.1,0.7)     | 0.2<br>(-0.1,0.5)    | 3.3                 | 0.3<br>(-0.02,0.5)   | 0.1<br>(-0.1,0.4)    | 3.2                 | 12491  | 0.1<br>(0.07,0.2)    | 0.05<br>(0.0,0.1)    | 52.4                | 0.1<br>(0.1,0.2)     | 0.08<br>(0.03,0.1)   | 52.9                | 0.04<br>(-0.01,0.09) | 0.0<br>(-0.05,0.04)  | 51.9                |
| <b>Overall adiposity</b>               |              |                      |                      |                     |                      |                      |                     |                      |                      |                     |        |                      |                      |                     |                      |                      |                     |                      |                      |                     |
| BMI z-score (SD units)                 | 699          | 0.5<br>(0.2,0.8)     | 0.3<br>(0.1,0.6)     | 7.4                 | 0.6<br>(0.3,0.9)     | 0.4<br>(0.1,0.7)     | 7.4                 | 0.6<br>(0.3,0.8)     | 0.4<br>(0.2,0.7)     | 7.5                 | 12485  | 0.4<br>(0.4,0.5)     | 0.3<br>(0.3,0.4)     | 95.4                | 0.4<br>(0.4,0.5)     | 0.4<br>(0.3,0.4)     | 94.3                | 0.4<br>(0.3,0.4)     | 0.3<br>(0.3,0.4)     | 91.6                |
| SS+TR (mm)                             | 700          | 2.8<br>(-0.8,6.4)    | 1.9<br>(-1.5,5.3)    | 6.3                 | 4.7<br>(0.7,8.7)     | 3.1<br>(-0.7,6.9)    | 6.3                 | 4.3<br>(0.4,8.2)     | 3.7<br>(0.03,7.3)    | 6.4                 | 12484  | 2.7<br>(2.2,3.1)     | 2.9<br>(2.4,3.3)     | 64.0                | 2.9<br>(2.4,3.4)     | 3.3<br>(2.8,3.8)     | 65.4                | 2.6<br>(2.1,3.2)     | 2.8<br>(2.3,3.3)     | 62.1                |
| Fat-mass index (kg/m <sup>2</sup> )    | 699          | 1.3<br>(0.4,2.2)     | 1.0<br>(0.2,1.7)     | 12.0                | 1.8<br>(0.8,2.8)     | 1.1<br>(0.3,2.0)     | 12.0                | 1.6<br>(0.6,2.6)     | 1.3<br>(0.4,2.1)     | 12.2                | 12397  | 0.5<br>(0.4,0.6)     | 0.5<br>(0.4,0.6)     | 84.8                | 0.5<br>(0.4,0.6)     | 0.6<br>(0.5,0.7)     | 85.5                | 0.5<br>(0.4,0.6)     | 0.5<br>(0.4,0.6)     | 83.6                |
| Obesity (Odds ratio)                   | 699          | 2.4<br>(1.3,4.5)     | 1.9<br>(0.8,4.2)     | 120.5               | 2.8<br>(1.5,5.5)     | 2.1<br>(0.9,4.9)     | 121.0               | 2.8<br>(1.5,5.4)     | 2.7<br>(1.2,6.6)     | 123.3               | 12485  | 2.0<br>(1.7,2.4)     | 1.9<br>(1.6,2.3)     | 278.3               | 2.2<br>(1.8,2.6)     | 2.1<br>(1.7,2.5)     | 284.0               | 2.0<br>(1.7,2.5)     | 2.0<br>(1.6,2.4)     | 277.3               |
| <b>Metabolic risk score components</b> |              |                      |                      |                     |                      |                      |                     |                      |                      |                     |        |                      |                      |                     |                      |                      |                     |                      |                      |                     |
| Waist circumference (cm)               | 702          | 4.9<br>(1.9,8.0)     | 3.5<br>(0.7,6.3)     | 7.3                 | 5.9<br>(2.5,9.3)     | 3.9<br>(0.8,7.1)     | 7.3                 | 5.4<br>(2.2,8.7)     | 4.4<br>(1.4,7.4)     | 7.4                 | 12490  | 2.7<br>(2.3,3.0)     | 2.2<br>(1.9,2.6)     | 79.7                | 3.1<br>(2.7,3.4)     | 2.6<br>(2.3,3.0)     | 82.2                | 2.5<br>(2.2,2.9)     | 2.1<br>(1.8,2.5)     | 77.0                |
| Systolic BP z-score (SD units)         | 696          | 0.1<br>(-0.1,0.4)    | 0.1<br>(-0.1,0.4)    | 1.3                 | 0.1<br>(-0.1,0.4)    | 0.1<br>(-0.1,0.4)    | 1.3                 | 0.1<br>(-0.1,0.4)    | 0.1<br>(-0.1,0.4)    | 1.3                 | 12454  | 0.05<br>(0.01,0.08)  | 0.05<br>(0.02,0.09)  | 8.0                 | 0.05<br>(0.01,0.08)  | 0.05<br>(0.01,0.09)  | 7.9                 | 0.05<br>(0.02,0.09)  | 0.06<br>(0.02,0.1)   | 8.0                 |
| HOMA-IR                                | 408          | 0.0<br>(-0.2,0.2)    | -0.02<br>(-0.2,0.2)  | 2.4                 | 0.04<br>(-0.2,0.3)   | 0.0<br>(-0.2,0.2)    | 2.4                 | 0.01<br>(-0.2,0.2)   | 0.01<br>(-0.2,0.2)   | 2.4                 | 11734  | 0.02<br>(-0.03,0.06) | 0.08<br>(0.03,0.13)  | 27.3                | 0.01<br>(-0.05,0.06) | 0.09<br>(0.04,0.14)  | 27.4                | 0.01<br>(-0.04,0.06) | 0.06<br>(0.01,0.11)  | 27.0                |
| HDL-cholesterol (mg/dL)                | 463          | 0.7<br>(-3.5,4.9)    | -0.3<br>(-4.6,3.9)   | 1.9                 | -1.7<br>(-6.2,2.8)   | -2.8<br>(-7.4,1.8)   | 1.9                 | 0.9<br>(-3.6,5.5)    | -0.2<br>(-4.8,4.4)   | 1.9                 | NA     | NA                   | NA                   | NA                  | NA                   | NA                   | NA                  | NA                   | NA                   | NA                  |
| Triglycerides (mg/dL)                  | 462          | -3.2<br>(-13.2,6.8)  | -0.8<br>(-11.2,9.6)  | 1.0                 | 0.2<br>(-10.5,10.9)  | 2.8<br>(-8.4,13.9)   | 1.1                 | -0.3<br>(-10.5,11.2) | 2.7<br>(-8.6,13.9)   | 1.1                 | NA     | NA                   | NA                   | NA                  | NA                   | NA                   | NA                  | NA                   | NA                   | NA                  |
| Apo A1 (g/L)                           | NA           | NA                   | NA                   | NA                  | NA                   | NA                   | NA                  | NA                   | NA                   | NA                  | 12008  | 0.01<br>(-0.01,0.03) | 0.0<br>(-0.01,0.02)  | 2.1                 | 0.01<br>(-0.01,0.03) | 0.0<br>(-0.01,0.02)  | 2.1                 | 0.0<br>(-0.01,0.02)  | 0.0<br>(-0.02,0.01)  | 2.1                 |
| <b>Global metabolic risk</b>           |              |                      |                      |                     |                      |                      |                     |                      |                      |                     |        |                      |                      |                     |                      |                      |                     |                      |                      |                     |
| Metabolic risk score (units)           | 405          | 0.03<br>(-0.2,0.2)   | 0.05<br>(-0.2,0.3)   | 2.3                 | 0.1<br>(-0.1,0.3)    | 0.1<br>(-0.1,0.3)    | 2.3                 | 0.05<br>(-0.2,0.3)   | 0.07<br>(-0.2,0.3)   | 2.3                 | 11407  | 0.1<br>(0.08,0.1)    | 0.1<br>(0.07,0.12)   | 32.1                | 0.1<br>(0.09,0.1)    | 0.11<br>(0.08,0.14)  | 32.5                | 0.09<br>(0.07,0.1)   | 0.08<br>(0.06,0.11)  | 30.4                |

<sup>a</sup> Unadjusted

<sup>b</sup> Adjusted for maternal age, marital status, educational attainment, pre-pregnancy BMI, total gestational weight gain, smoking history, glucose tolerance status, and gestational hypertensive disorders and child gestational age at delivery, race/ethnicity, sex, birth weight for gestational age z-scores, breastfeeding status at 6 months and age at outcome measurement.

<sup>c</sup> Adjusted for maternal age, maternal BMI at 6.5 years, educational attainment, marital status, smoking during pregnancy, gestational age at delivery, child sex, birth weight for gestational age z-scores and age at outcome measurement.

**eTable 6:** Associations of being overweight at 18 months with lean mass, adiposity and metabolic risk score components at early adolescence

|                                        | Project Viva |                      |                      |                     |                      |                      |                     |                      |                      |                     | PROBIT |                      |                      |                     |                      |                      |                     |                      |                      |                     |
|----------------------------------------|--------------|----------------------|----------------------|---------------------|----------------------|----------------------|---------------------|----------------------|----------------------|---------------------|--------|----------------------|----------------------|---------------------|----------------------|----------------------|---------------------|----------------------|----------------------|---------------------|
|                                        | N            | CDC WFL [β (95% CI)] |                      |                     | WHO WFL [β (95% CI)] |                      |                     | WHO BMI [β (95% CI)] |                      |                     | N      | CDC WFL [β (95% CI)] |                      |                     | WHO WFL [β (95% CI)] |                      |                     | WHO BMI [β (95% CI)] |                      |                     |
|                                        |              | Model 1 <sup>a</sup> | Model 2 <sup>b</sup> | F-statistic Model 2 | Model 1 <sup>a</sup> | Model 2 <sup>b</sup> | F-statistic Model 2 | Model 1 <sup>a</sup> | Model 2 <sup>b</sup> | F-statistic Model 2 |        | Model 1 <sup>a</sup> | Model 2 <sup>c</sup> | F-statistic Model 2 | Model 1 <sup>a</sup> | Model 2 <sup>c</sup> | F-statistic Model 2 | Model 1 <sup>a</sup> | Model 2 <sup>c</sup> | F-statistic Model 2 |
| <b>Lean mass</b>                       |              |                      |                      |                     |                      |                      |                     |                      |                      |                     |        |                      |                      |                     |                      |                      |                     |                      |                      |                     |
| Height z-score (SD units)              | 634          | 0.5<br>(0.2,0.7)     | 0.3<br>(0.1,0.6)     | 3.2                 | 0.5<br>(0.2,0.7)     | 0.3<br>(0.1,0.6)     | 3.2                 | 0.3<br>(0.1,0.6)     | 0.2<br>(-0.03,0.5)   | 3.1                 | 2908   | 0.2<br>(0.1,0.3)     | 0.1<br>(0.03,0.2)    | 12.1                | 0.2<br>(0.1,0.3)     | 0.1<br>(0.04,0.2)    | 12.2                | 0.1<br>(0.05,0.2)    | 0.1<br>(0.0,0.2)     | 11.9                |
| <b>Overall adiposity</b>               |              |                      |                      |                     |                      |                      |                     |                      |                      |                     |        |                      |                      |                     |                      |                      |                     |                      |                      |                     |
| BMI z-score (SD units)                 | 634          | 0.9<br>(0.7,1.2)     | 0.8<br>(0.5,1.0)     | 8.7                 | 0.9<br>(0.6,1.2)     | 0.7<br>(0.5,1.0)     | 8.5                 | 0.9<br>(0.6,1.1)     | 0.7<br>(0.5,1.0)     | 8.5                 | 2906   | 0.6<br>(0.5,0.7)     | 0.5<br>(0.4,0.6)     | 25.9                | 0.6<br>(0.5,0.7)     | 0.5<br>(0.4,0.6)     | 25.4                | 0.6<br>(0.5,0.7)     | 0.5<br>(0.4,0.6)     | 25.4                |
| SS+TR (mm)                             | 632          | 8.8<br>(5.3,12.2)    | 7.1<br>(3.8,10.4)    | 7.7                 | 7.6<br>(4.0,11.3)    | 5.9<br>(2.9,9.3)     | 7.4                 | 7.5<br>(4.0,11.0)    | 6.0<br>(2.7,9.3)     | 7.4                 | 2907   | 4.5<br>(3.3,5.7)     | 4.5<br>(3.4,5.7)     | 15.5                | 4.5<br>(3.3,5.7)     | 4.4<br>(3.2,5.6)     | 15.0                | 4.2<br>(3.1,5.3)     | 4.1<br>(3.0,5.2)     | 14.9                |
| Fat-mass index (kg/m <sup>2</sup> )    | 633          | 2.7<br>(1.9,3.6)     | 2.2<br>(1.5,3.0)     | 13.2                | 2.6<br>(1.7,3.4)     | 2.1<br>(1.3,2.8)     | 12.8                | 2.5<br>(1.6,3.4)     | 2.1<br>(1.4,2.9)     | 13.0                | 2895   | 1.0<br>(0.8,1.3)     | 1.1<br>(0.8,1.3)     | 25.3                | 1.0<br>(0.8,1.3)     | 1.1<br>(0.8,1.3)     | 24.8                | 1.0<br>(0.8,1.2)     | 1.0<br>(0.8,1.2)     | 24.5                |
| Obesity (Odds ratio)                   | 634          | 4.6<br>(2.6,8.1)     | 5.0<br>(2.4,10.1)    | 126.3               | 3.6<br>(2.0,6.6)     | 3.7<br>(1.7,7.7)     | 118.7               | 4.3<br>(2.4,7.6)     | 4.6<br>(2.2,9.5)     | 124.0               | 2906   | 3.2<br>(2.3,4.5)     | 2.9<br>(2.0,4.1)     | 101.9               | 3.3<br>(2.3,4.7)     | 2.9<br>(2.0,4.1)     | 101.4               | 3.0<br>(2.1,4.2)     | 2.7<br>(1.9,3.9)     | 99.5                |
| <b>Metabolic risk score components</b> |              |                      |                      |                     |                      |                      |                     |                      |                      |                     |        |                      |                      |                     |                      |                      |                     |                      |                      |                     |
| Waist circumference (cm)               | 635          | 9.9<br>(7.0,12.7)    | 8.0<br>(5.0,10.7)    | 9.0                 | 9.1<br>(6.1,12.0)    | 7.3<br>(4.5,10.1)    | 8.6                 | 9.3<br>(6.4,12.2)    | 7.6<br>(4.9,10.3)    | 8.8                 | 2909   | 4.6<br>(3.7,5.4)     | 4.1<br>(3.3,4.9)     | 23.8                | 4.7<br>(3.8,5.5)     | 4.1<br>(3.3,5.0)     | 23.7                | 4.3<br>(3.5,5.1)     | 3.9<br>(3.1,4.7)     | 23.6                |
| Systolic BP z-score (SD units)         | 630          | 0.02<br>(-0.2,0.2)   | 0.0<br>(-0.2,0.2)    | 1.2                 | 0.01<br>(-0.2,0.2)   | -0.02<br>(-0.2,0.2)  | 1.2                 | -0.04<br>(-0.3,0.2)  | -0.07<br>(-0.3,0.1)  | 1.2                 | 2899   | 0.08<br>(0.0,0.16)   | 0.08<br>(-0.01,0.16) | 3.1                 | 0.07<br>(-0.02,0.16) | 0.06<br>(-0.02,0.15) | 3.0                 | 0.05<br>(-0.03,0.13) | 0.05<br>(-0.04,0.13) | 2.9                 |
| HOMA-IR                                | 374          | 0.3<br>(0.1,0.5)     | 0.3<br>(0.1,0.5)     | 3.0                 | 0.3<br>(0.1,0.5)     | 0.3<br>(0.1,0.4)     | 2.9                 | 0.3<br>(0.1,0.5)     | 0.3<br>(0.1,0.4)     | 2.9                 | 2756   | 0.04<br>(-0.07,0.1)  | 0.09<br>(-0.01,0.2)  | 6.5                 | 0.03<br>(-0.08,0.1)  | 0.09<br>(-0.02,0.2)  | 6.5                 | 0.06<br>(-0.05,0.1)  | 0.09<br>(-0.01,0.2)  | 6.6                 |
| HDL-cholesterol (mg/dL)                | 420          | -3.5<br>(-7.7,0.7)   | -3.7<br>(-8.0,0.6)   | 1.9                 | -3.1<br>(-7.4,1.2)   | -3.3<br>(-7.7,1.1)   | 1.9                 | -4.6<br>(-8.9,-0.4)  | -5.1<br>(-9.5,-0.7)  | 2.0                 | NA     | NA                   | NA                   | NA                  | NA                   | NA                   | NA                  | NA                   | NA                   | NA                  |
| Triglycerides (mg/dL)                  | 419          | 5.2<br>(-4.8,15.1)   | 6.5<br>(-3.9,16.8)   | 1.4                 | 5.8<br>(-4.5,16.0)   | 6.8<br>(-3.8,17.4)   | 1.4                 | 5.0<br>(-5.1,15.2)   | 6.7<br>(-4.0,17.3)   | 1.4                 | NA     | NA                   | NA                   | NA                  | NA                   | NA                   | NA                  | NA                   | NA                   | NA                  |
| Apo A1 (g/L)                           | NA           | NA                   | NA                   | NA                  | NA                   | NA                   | NA                  | NA                   | NA                   | NA                  | 2798   | 0.0<br>(-0.04,0.04)  | 0.0<br>(-0.04,0.04)  | 1.2                 | 0.01<br>(-0.03,0.05) | 0.0<br>(-0.04,0.04)  | 1.2                 | 0.01<br>(-0.02,0.05) | 0.01<br>(-0.02,0.05) | 1.2                 |
| <b>Global metabolic risk</b>           |              |                      |                      |                     |                      |                      |                     |                      |                      |                     |        |                      |                      |                     |                      |                      |                     |                      |                      |                     |
| Metabolic risk score (units)           | 373          | 0.3<br>(0.2,0.5)     | 0.3<br>(0.1,0.5)     | 2.7                 | 0.3<br>(0.1,0.5)     | 0.3<br>(0.1,0.5)     | 2.6                 | 0.3<br>(0.1,0.5)     | 0.3<br>(0.1,0.5)     | 2.6                 | 2690   | 0.2<br>(0.1,0.2)     | 0.14<br>(0.09,0.19)  | 10.4                | 0.2<br>(0.1,0.2)     | 0.15<br>(0.09,0.21)  | 10.6                | 0.2<br>(0.1,0.2)     | 0.15<br>(0.09,0.20)  | 10.7                |

<sup>a</sup> Unadjusted

<sup>b</sup> Adjusted for maternal age, marital status, educational attainment, pre-pregnancy BMI, total gestational weight gain, smoking history, glucose tolerance status, and gestational hypertensive disorders and child gestational age at delivery, race/ethnicity, sex, birth weight for gestational age z-scores, breastfeeding status at 6 months and age at outcome measurement.

<sup>c</sup> Adjusted for maternal age, maternal BMI at 6.5 years, educational attainment, marital status, smoking during pregnancy, gestational age at delivery, child sex, birth weight for gestational age z-scores and age at outcome measurement.



**eTable 7:** Associations of being overweight at 24 months with lean mass, adiposity and metabolic risk score components at early adolescence

|                                        | Project Viva |                      |                      |                     |                      |                      |                     |                      |                      |                     | PROBIT   |                      |                      |                     |                      |                      |                     |                      |                      |                     |
|----------------------------------------|--------------|----------------------|----------------------|---------------------|----------------------|----------------------|---------------------|----------------------|----------------------|---------------------|----------|----------------------|----------------------|---------------------|----------------------|----------------------|---------------------|----------------------|----------------------|---------------------|
|                                        | N            | CDC WFL [β (95% CI)] |                      |                     | WHO WFL [β (95% CI)] |                      |                     | WHO BMI [β (95% CI)] |                      |                     | N        | CDC WFL [β (95% CI)] |                      |                     | WHO WFL [β (95% CI)] |                      |                     | WHO BMI [β (95% CI)] |                      |                     |
|                                        |              | Model 1 <sup>a</sup> | Model 2 <sup>b</sup> | F-statistic Model 2 | Model 1 <sup>a</sup> | Model 2 <sup>b</sup> | F-statistic Model 2 | Model 1 <sup>a</sup> | Model 2 <sup>b</sup> | F-statistic Model 2 |          | Model 1 <sup>a</sup> | Model 2 <sup>c</sup> | F-statistic Model 2 | Model 1 <sup>a</sup> | Model 2 <sup>c</sup> | F-statistic Model 2 | Model 1 <sup>a</sup> | Model 2 <sup>c</sup> | F-statistic Model 2 |
| <b>Lean mass</b>                       |              |                      |                      |                     |                      |                      |                     |                      |                      |                     |          |                      |                      |                     |                      |                      |                     |                      |                      |                     |
| Height z-score (SD units)              | 56<br>3      | 0.5<br>(0.2,0.7)     | 0.3<br>(0.0,0.6)     | 2.9                 | 0.5<br>(0.2,0.8)     | 0.3<br>(0.0,0.6)     | 3.0                 | 0.5<br>(0.2,0.8)     | 0.3<br>(-0.01,0.6)   | 2.9                 | 450<br>3 | 0.1<br>(0.05,0.2)    | 0.09<br>(0.01,0.2)   | 18.3                | 0.1<br>(0.0,0.2)     | 0.05<br>(-0.03,0.1)  | 18.1                | 0.03<br>(-0.06,0.1)  | -0.01<br>(-0.1,0.07) | 18.0                |
| <b>Overall adiposity</b>               |              |                      |                      |                     |                      |                      |                     |                      |                      |                     |          |                      |                      |                     |                      |                      |                     |                      |                      |                     |
| BMI z-score (SD units)                 | 56<br>3      | 1.0<br>(0.7,1.3)     | 0.8<br>(0.5,1.0)     | 6.9                 | 1.0<br>(0.6,1.3)     | 0.7<br>(0.4,1.0)     | 6.7                 | 1.0<br>(0.7,1.3)     | 0.8<br>(0.5,1.1)     | 6.9                 | 450<br>2 | 0.6<br>(0.5,0.6)     | 0.5<br>(0.4,0.6)     | 42.8                | 0.6<br>(0.5,0.7)     | 0.5<br>(0.4,0.6)     | 42.1                | 0.5<br>(0.4,0.6)     | 0.4<br>(0.3,0.5)     | 40.2                |
| SS+TR (mm)                             | 56<br>3      | 10.8<br>(7.2,14.5)   | 9.0<br>(5.5,12.6)    | 5.8                 | 10.4<br>(6.6,14.3)   | 8.5<br>(4.8,12.3)    | 5.6                 | 11.7<br>(7.7,15.6)   | 9.4<br>(5.5,13.2)    | 5.7                 | 450<br>1 | 4.1<br>(3.1,5.0)     | 4.2<br>(3.3,5.1)     | 29.8                | 3.9<br>(2.9,4.9)     | 4.0<br>(3.1,5.0)     | 28.7                | 3.6<br>(2.7,4.5)     | 3.5<br>(2.6,4.4)     | 27.9                |
| Fat-mass index (kg/m <sup>2</sup> )    | 56<br>2      | 2.9<br>(2.0,3.8)     | 2.2<br>(1.4,3.0)     | 10.1                | 2.9<br>(1.9,3.8)     | 2.2<br>(1.4,3.0)     | 9.9                 | 3.2<br>(2.3,4.2)     | 2.4<br>(1.5,3.3)     | 10.1                | 448<br>3 | 0.9<br>(0.7,1.1)     | 0.9<br>(0.7,1.1)     | 38.3                | 0.9<br>(0.7,1.1)     | 0.9<br>(0.7,1.1)     | 37.8                | 0.8<br>(0.6,1.0)     | 0.8<br>(0.6,1.0)     | 36.0                |
| Obesity (Odds ratio)                   | 56<br>3      | 4.2<br>(2.2,8.0)     | 3.8<br>(1.7,8.8)     | 91.7                | 4.3<br>(2.2,8.5)     | 4.1<br>(1.7,9.6)     | 91.9                | 5.6<br>(2.8,11.1)    | 5.2<br>(2.2,12.3)    | 95.5                | 450<br>2 | 2.7<br>(2.0,3.6)     | 2.4<br>(1.8,3.3)     | 149.3               | 2.6<br>(1.9,3.5)     | 2.3<br>(1.7,3.2)     | 146.4               | 2.3<br>(1.7,3.1)     | 2.0<br>(1.5,2.8)     | 140.3               |
| <b>Metabolic risk score components</b> |              |                      |                      |                     |                      |                      |                     |                      |                      |                     |          |                      |                      |                     |                      |                      |                     |                      |                      |                     |
| Waist circumference (cm)               | 56<br>4      | 9.7<br>(6.7,12.7)    | 7.9<br>(4.9,10.8)    | 6.3                 | 9.8<br>(6.6,12.9)    | 7.9<br>(4.9,11.0)    | 6.2                 | 10.6<br>(7.4,13.9)   | 8.7<br>(5.6,11.9)    | 6.3                 | 450<br>3 | 3.8<br>(3.1,4.5)     | 3.3<br>(2.7,4.0)     | 31.9                | 3.7<br>(3.0,4.4)     | 3.2<br>(2.5,3.9)     | 30.9                | 3.1<br>(2.5,3.8)     | 2.6<br>(2.0,3.2)     | 29.1                |
| Systolic BP z-score (SD units)         | 55<br>7      | 0.09<br>(-0.1,0.3)   | 0.08<br>(-0.2,0.3)   | 1.3                 | 0.09<br>(-0.2,0.3)   | 0.07<br>(-0.2,0.3)   | 1.3                 | 0.1<br>(-0.1,0.4)    | 0.1<br>(-0.1,0.4)    | 1.3                 | 449<br>3 | 0.02<br>(-0.05,0.08) | 0.02<br>(-0.05,0.09) | 4.6                 | 0.02<br>(-0.05,0.09) | 0.03<br>(-0.05,0.1)  | 4.6                 | 0.04<br>(-0.03,0.1)  | 0.04<br>(-0.03,0.1)  | 4.7                 |
| HOMA-IR                                | 33<br>8      | 0.3<br>(0.1,0.5)     | 0.3<br>(0.1,0.5)     | 2.9                 | 0.3<br>(0.1,0.5)     | 0.3<br>(0.1,0.5)     | 2.8                 | 0.3<br>(0.0,0.5)     | 0.2<br>(-0.02,0.5)   | 2.6                 | 424<br>2 | 0.08<br>(-0.01,0.2)  | 0.13<br>(0.04,0.22)  | 9.5                 | 0.1<br>(0.0,0.2)     | 0.14<br>(0.05,0.24)  | 9.6                 | 0.1<br>(0.01,0.2)    | 0.13<br>(0.04,0.22)  | 9.5                 |
| HDL-cholesterol (mg/dL)                | 37<br>8      | -2.4<br>(-6.9,2.2)   | -4.1<br>(-8.7,0.6)   | 2.1                 | -1.7<br>(-6.5,3.0)   | -3.2<br>(-8.1,1.7)   | 2.0                 | -1.5<br>(-6.5,3.6)   | -4.0<br>(-9.2,1.3)   | 2.1                 | NA       | NA                   | NA                   | NA                  | NA                   | NA                   | NA                  | NA                   | NA                   | NA                  |
| Triglycerides (mg/dL)                  | 37<br>7      | 0.9<br>(-9.6,11.4)   | 3.1<br>(-8.1,14.3)   | 1.0                 | -1.4<br>(-12.5,9.7)  | -0.7<br>(-12.4,11.1) | 1.0                 | -5.2<br>(-16.9,6.5)  | -4.6<br>(-17.1,8.0)  | 1.1                 | NA       | NA                   | NA                   | NA                  | NA                   | NA                   | NA                  | NA                   | NA                   | NA                  |
| Apo A1 (g/L)                           | NA           | NA                   | NA                   | NA                  | NA                   | NA                   | NA                  | NA                   | NA                   | NA                  | 433<br>9 | 0.0<br>(-0.03,0.04)  | 0.0<br>(-0.03,0.03)  | 1.3                 | 0.0<br>(-0.03,0.04)  | 0.0<br>(-0.03,0.03)  | 1.3                 | 0.0<br>(-0.03,0.03)  | 0.0<br>(-0.03,0.03)  | 1.3                 |
| <b>Global metabolic risk</b>           |              |                      |                      |                     |                      |                      |                     |                      |                      |                     |          |                      |                      |                     |                      |                      |                     |                      |                      |                     |
| Metabolic risk score (units)           | 33<br>5      | 0.3<br>(0.1,0.5)     | 0.3<br>(0.1,0.5)     | 2.9                 | 0.3<br>(0.04,0.5)    | 0.3<br>(0.04,0.5)    | 2.8                 | 0.3<br>(0.01,0.5)    | 0.3<br>(0.0,0.5)     | 2.7                 | 412<br>1 | 0.1<br>(0.08,0.2)    | 0.11<br>(0.06,0.15)  | 12.3                | 0.1<br>(0.07,0.2)    | 0.1<br>(0.06,0.15)   | 12.1                | 0.1<br>(0.06,0.2)    | 0.09<br>(0.04,0.13)  | 11.8                |

<sup>a</sup> Unadjusted

<sup>b</sup> Adjusted for maternal age, marital status, educational attainment, pre-pregnancy BMI, total gestational weight gain, smoking history, glucose tolerance status, and gestational hypertensive disorders and child gestational age at delivery, race/ethnicity, sex, birth weight for gestational age z-scores, breastfeeding status at 6 months and age at outcome measurement.

<sup>c</sup> Adjusted for maternal age, maternal BMI at 6.5 years, educational attainment, marital status, smoking during pregnancy, gestational age at delivery, child sex, birth weight for gestational age z-scores and age at outcome measurement.

**eTable 8:** Associations of number of timepoints overweight at 6–24 months with lean mass, adiposity and metabolic risk score components at early adolescence

|                | Lean mass          |                       | Total adiposity   |                     |                   |                     |                   |                     |                   |                     | Metabolic risk score components |                     |                     |                      |                     |                      | MetS risk score     |                     |     |
|----------------|--------------------|-----------------------|-------------------|---------------------|-------------------|---------------------|-------------------|---------------------|-------------------|---------------------|---------------------------------|---------------------|---------------------|----------------------|---------------------|----------------------|---------------------|---------------------|-----|
|                | Height z-score     |                       | BMI z-score       |                     | SS+TR             |                     | Fat mass index    |                     | Obesity           |                     | Waist Circumference             |                     | Systolic BP z-score |                      | HOMA-IR             |                      | Viva <sup>a</sup>   | PROBIT <sup>b</sup> |     |
|                | Viva <sup>a</sup>  | PROBIT <sup>b</sup>   | Viva <sup>a</sup> | PROBIT <sup>b</sup> | Viva <sup>a</sup> | PROBIT <sup>b</sup> | Viva <sup>a</sup> | PROBIT <sup>b</sup> | Viva <sup>a</sup> | PROBIT <sup>b</sup> | Viva <sup>a</sup>               | PROBIT <sup>b</sup> | Viva <sup>a</sup>   | PROBIT <sup>b</sup>  | Viva <sup>a</sup>   | PROBIT <sup>b</sup>  |                     |                     |     |
| <b>CDC WFL</b> |                    |                       |                   |                     |                   |                     |                   |                     |                   |                     |                                 |                     |                     |                      |                     |                      |                     |                     |     |
| 0              | ref                | ref                   | ref               | ref                 | ref               | ref                 | ref               | ref                 | ref               | ref                 | ref                             | ref                 | ref                 | ref                  | ref                 | ref                  | ref                 | ref                 | ref |
| 1              | 0.1<br>(-0.06,0.3) | 0.03<br>(-0.02,0.07)  | 0.3<br>(0.1,0.5)  | 0.3<br>(0.2,0.3)    | 0.6<br>(-1.8,2.9) | 2.1<br>(1.6,2.6)    | 0.4<br>(-0.1,0.9) | 0.4<br>(0.3,0.5)    | 1.1<br>(0.6,2.2)  | 1.7<br>(1.4,2.1)    | 2.2<br>(0.3,4.1)                | 1.7<br>(1.4,2.1)    | 0.03<br>(-0.1,0.2)  | 0.03<br>(0.0,0.07)   | -0.06<br>(-0.2,0.1) | 0.05<br>(0.0,0.1)    | -0.03<br>(-0.2,0.1) | 0.07<br>(0.04,0.09) |     |
| 2              | 0.3<br>(-0.05,0.6) | 0.03<br>(-0.04,0.09)  | 0.7<br>(0.4,1.0)  | 0.5<br>(0.4,0.5)    | 6.7<br>(2.6,10.7) | 3.6<br>(2.9,4.3)    | 2.2<br>(1.2,3.1)  | 0.7<br>(0.6,0.9)    | 5.2<br>(2.3,11.7) | 2.7<br>(2.1,3.4)    | 8.5<br>(5.1,11.8)               | 2.7<br>(2.2,3.2)    | 0.3<br>(0.1,0.6)    | 0.09<br>(0.03,0.14)  | 0.4<br>(0.1,0.6)    | 0.1<br>(0.04,0.2)    | 0.3<br>(0.1,0.6)    | 0.13<br>(0.09,0.17) |     |
| 3–4            | 0.2<br>(-0.2,0.6)  | 0.06<br>(-0.07,0.2)   | 0.7<br>(0.4,1.1)  | 0.7<br>(0.6,0.8)    | 5.4<br>(0.9,9.9)  | 5.8<br>(4.4,7.3)    | 1.7<br>(0.7,2.7)  | 1.3<br>(1.1,1.6)    | 2.1<br>(0.7,6.4)  | 3.7<br>(2.5,5.6)    | 5.8<br>(2.0,9.5)                | 4.9<br>(3.9,5.9)    | -0.04<br>(-0.4,0.3) | 0.09<br>(-0.2,0.2)   | 0.1<br>(-0.1,0.4)   | 0.2<br>(0.02,0.3)    | 0.2<br>(-0.03,0.5)  | 0.14<br>(0.07,0.21) |     |
| <b>WHO WFL</b> |                    |                       |                   |                     |                   |                     |                   |                     |                   |                     |                                 |                     |                     |                      |                     |                      |                     |                     |     |
| 0              | ref                | ref                   | ref               | ref                 | ref               | ref                 | ref               | ref                 | ref               | ref                 | ref                             | ref                 | ref                 | ref                  | ref                 | ref                  | ref                 | ref                 | ref |
| 1              | 0.2<br>(-0.02,0.4) | 0.03<br>(-0.02,0.08)  | 0.4<br>(0.2,0.6)  | 0.3<br>(0.2,0.3)    | 1.8<br>(-0.8,4.4) | 2.3<br>(1.8,2.8)    | 0.7<br>(0.1,1.3)  | 0.5<br>(0.4,0.6)    | 1.6<br>(0.8,3.0)  | 1.8<br>(1.5,2.2)    | 3.1<br>(1.0,5.3)                | 1.9<br>(1.6,2.3)    | 0.03<br>(-0.2,0.2)  | 0.04<br>(0.0,0.08)   | 0.02<br>(-0.1,0.2)  | 0.06<br>(0.01,0.1)   | 0.03<br>(-0.1,0.2)  | 0.07<br>(0.05,0.1)  |     |
| 2              | 0.3<br>(-0.07,0.7) | 0.06<br>(-0.01,0.1)   | 0.7<br>(0.3,1.0)  | 0.5<br>(0.4,0.5)    | 4.8<br>(0.0,9.5)  | 3.9<br>(3.1,4.7)    | 1.9<br>(0.8,3.0)  | 0.7<br>(0.6,0.9)    | 3.2<br>(1.1,9.1)  | 2.6<br>(2.0,3.4)    | 8.0<br>(4.0,11.9)               | 2.9<br>(2.3,3.5)    | 0.2<br>(-0.1,0.5)   | 0.05<br>(-0.01,0.11) | 0.4<br>(0.1,0.7)    | 0.1<br>(0.04,0.2)    | 0.4<br>(0.1,0.7)    | 0.12<br>(0.08,0.16) |     |
| 3–4            | 0.1<br>(-0.3,0.5)  | 0.06<br>(-0.09,0.2)   | 0.8<br>(0.4,1.1)  | 0.8<br>(0.6,0.9)    | 5.9<br>(1.0,10.8) | 6.6<br>(4.8,8.3)    | 2.0<br>(0.9,3.1)  | 1.6<br>(1.2,1.9)    | 2.8<br>(0.9,8.4)  | 4.0<br>(2.5,6.4)    | 6.2<br>(2.2,10.3)               | 5.8<br>(4.6,7.0)    | 0.01<br>(-0.3,0.3)  | 0.1<br>(0.0,0.3)     | 0.07<br>(-0.2,0.4)  | 0.2<br>(0.04,0.4)    | 0.1<br>(-0.1,0.4)   | 0.2<br>(0.11,0.28)  |     |
| <b>WHO BMI</b> |                    |                       |                   |                     |                   |                     |                   |                     |                   |                     |                                 |                     |                     |                      |                     |                      |                     |                     |     |
| 0              | ref                | ref                   | ref               | ref                 | ref               | ref                 | ref               | ref                 | ref               | ref                 | ref                             | ref                 | ref                 | ref                  | ref                 | ref                  | ref                 | ref                 | ref |
| 1              | 0.2<br>(-0.04,0.4) | -0.02<br>(-0.07,0.02) | 0.4<br>(0.2,0.6)  | 0.3<br>(0.2,0.3)    | 2.5<br>(-0.1,5.1) | 2.2<br>(1.7,2.7)    | 1.0<br>(0.4,1.6)  | 0.4<br>(0.3,0.5)    | 1.9<br>(1.0,3.7)  | 1.7<br>(1.4,2.1)    | 4.4<br>(2.3,6.6)                | 1.7<br>(1.4,2.1)    | -0.03<br>(-0.2,0.1) | 0.03<br>(0.01,0.07)  | 0.05<br>(-0.1,0.2)  | 0.04<br>(-0.01,0.09) | 0.06<br>(-0.1,0.2)  | 0.06<br>(0.04,0.09) |     |
| 2              | 0.4<br>(0.03,0.7)  | -0.01<br>(-0.08,0.07) | 0.7<br>(0.4,1.0)  | 0.5<br>(0.4,0.5)    | 6.4<br>(2.2,10.6) | 3.6<br>(2.7,4.4)    | 2.0<br>(1.0,2.9)  | 0.7<br>(0.6,0.9)    | 4.2<br>(1.8,10.2) | 2.7<br>(2.1,3.5)    | 7.4<br>(3.9,10.9)               | 2.7<br>(2.1,3.3)    | 0.09<br>(-0.2,0.4)  | 0.07<br>(0.01,0.13)  | 0.3<br>(0.03,0.5)   | 0.08<br>(0.0,0.2)    | 0.3<br>(0.07,0.6)   | 0.11<br>(0.07,0.15) |     |
| 3–4            | -0.1<br>(-0.6,0.3) | -0.04<br>(-0.2,0.1)   | 0.8<br>(0.4,1.2)  | 0.7<br>(0.5,0.9)    | 5.8<br>(0.1,11.5) | 5.8<br>(4.1,7.6)    | 2.1<br>(0.8,3.4)  | 1.4<br>(1.1,1.7)    | 3.7<br>(1.1,13.1) | 3.8<br>(2.3,6.1)    | 6.8<br>(2.0,11.5)               | 4.8<br>(3.6,6.0)    | 0.1<br>(-0.3,0.5)   | 0.2<br>(0.03,0.3)    | 0.01<br>(-0.3,0.4)  | 0.2<br>(0.07,0.4)    | 0.1<br>(-0.2,0.5)   | 0.17<br>(0.09,0.26) |     |

<sup>a</sup> Adjusted for maternal age, marital status, educational attainment, pre-pregnancy BMI, total gestational weight gain, smoking history, glucose tolerance status, and gestational hypertensive disorders and child gestational age at delivery, race/ethnicity, sex, birth weight for gestational age z-scores, breastfeeding status at 6 months and age at outcome measurement.

<sup>b</sup> Adjusted for maternal age, maternal BMI at 6.5 years, educational attainment, marital status, smoking during pregnancy, gestational age at delivery, child sex, birth weight for gestational age z-scores and age at outcome measurement.
